# Supplementary material for: Aggregation prevention: reduction of graphene oxide in mixed medium of alkylphenol polyoxyethylene (7) ether and 2-methoxyethanol
Source: Royal Society of Chemistry journal article supplement (doi:10.1039/c8ra07263a), 2018-01-01
Supplement: c8ra07263a1.pdf [file c8ra07263a1.pdf]

## Supporting Information

### Aggregation Prevention: Reduction of Graphene Oxide in Mixed Medium of Alkylphenol Polyoxyethylene (7) Ether and 2-Methoxyethanol

Heng Su<sup>1</sup>, Chaocan Zhang<sup>1\*</sup>, Xi Li<sup>2</sup>, Lili Wu<sup>1</sup>, Yanjun Chen<sup>1</sup>

<sup>1</sup> Department of Materials Science and Engineering, Wuhan University of Technology, Wuhan 430070, China

<sup>2</sup> Department of Chemical Engineering and Life Sciences, Wuhan University of Technology, Wuhan 430070, China

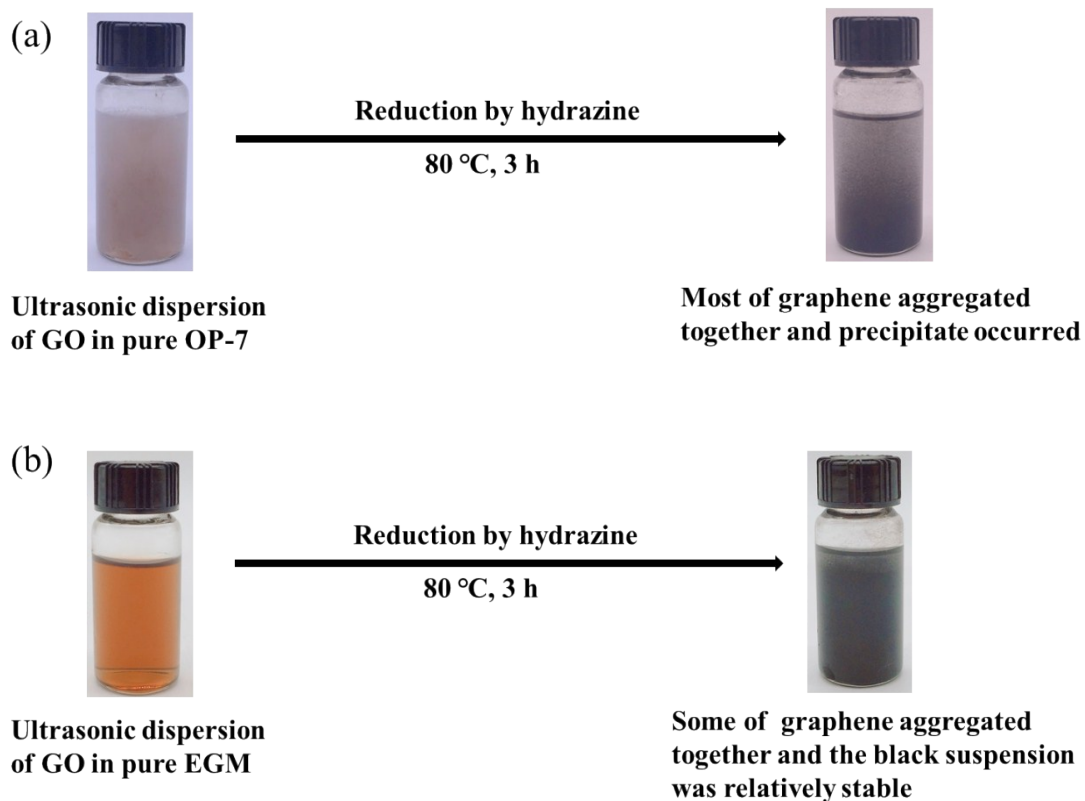

**Fig S1.** Reduction routes of GO in pure OP-7 (a) and in pure EGM (b).

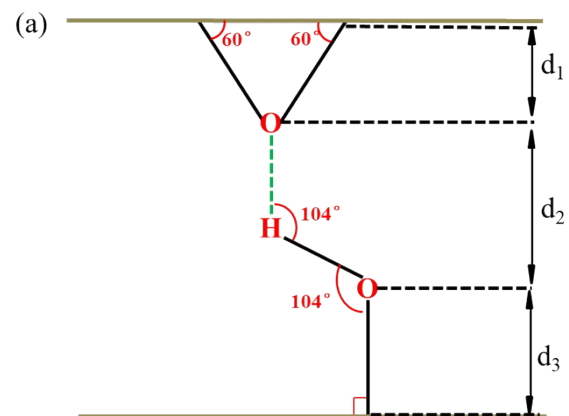

$$d = d_1 + d_2 + d_3 = 1.01 \text{ \AA} + 1.19 \text{ \AA} + 1.43 \text{ \AA} = 3.63 \text{ \AA}$$

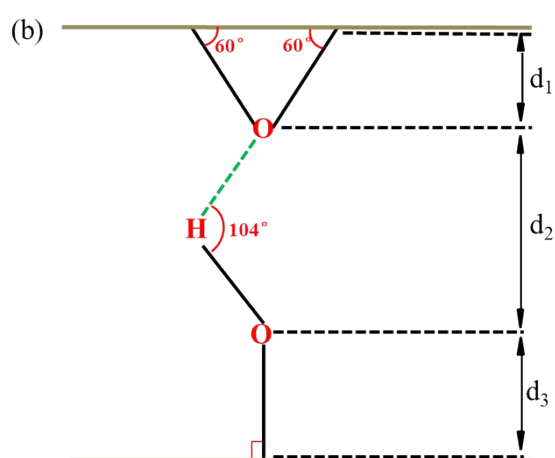

$$d = d_1 + d_2 + d_3 = 1.01 \text{ \AA} + 1.51 \text{ \AA} + 1.43 \text{ \AA} = 3.95 \text{ \AA}$$

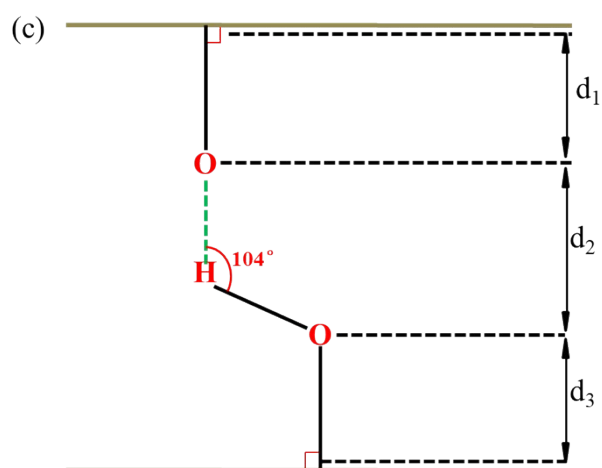

$$d = d_1 + d_2 + d_3 = 1.43 \text{ \AA} + 1.19 \text{ \AA} + 1.43 \text{ \AA} = 4.05 \text{ \AA}$$

**Fig S2.** (a), (b) and (c) schematics showing various configurations of hydrogen bonds in the graphene and calculates their layer spacing, respectively. The horizontal brown

lines denote the graphene, while hydrogen and oxygen atoms are shown as red H and red O, respectively.
